# Supplementary material
Source: MDPI journal article supplement (https://www.mdpi.com/2220-9964/7/2/69)
Supplement: s1 [file s1]

## Supplementary Material to the Journal Article: “Roughness Spectra Derived from Multi-Scale LiDAR Point Clouds of a Gravel Surface: A Comparison and Sensitivity Analysis”

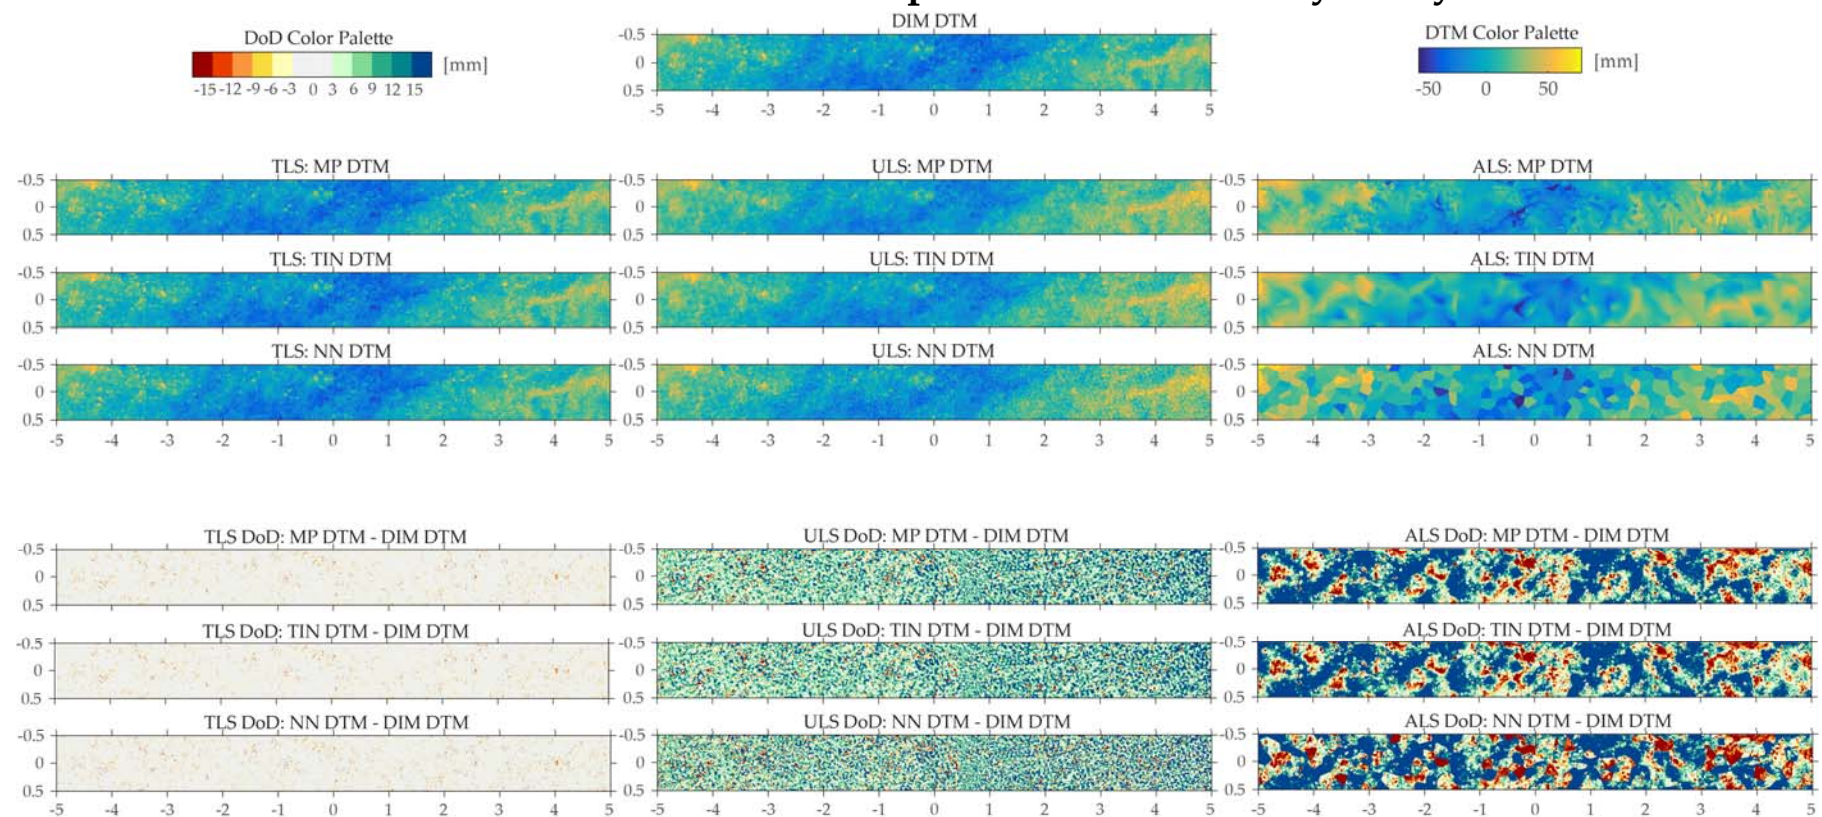

Figure S.1: A visualization of the interpolated, LiDAR DTMs, DIM DTM and the corresponding digital models of elevation differences (DoDs). The latter is calculated by subtracting the DIM DTM from a LiDAR DTM. TLS, ULS and ALS indicates that the corresponding DTM is interpolated from TLS, ULS and ALS dataset respectively. NN, TIN and MP indicates that the nearest neighbor, triangular irregular network or moving planes interpolation method, respectively, is used for the interpolation of the LiDAR point cloud. The color palettes are given in the upper left and right corner of the figure.
